# Supplementary material
Source: PubMed Central journal article supplement (PMC3740939)

# LDN-F

# LDN-DF

# DF-LDN-DF

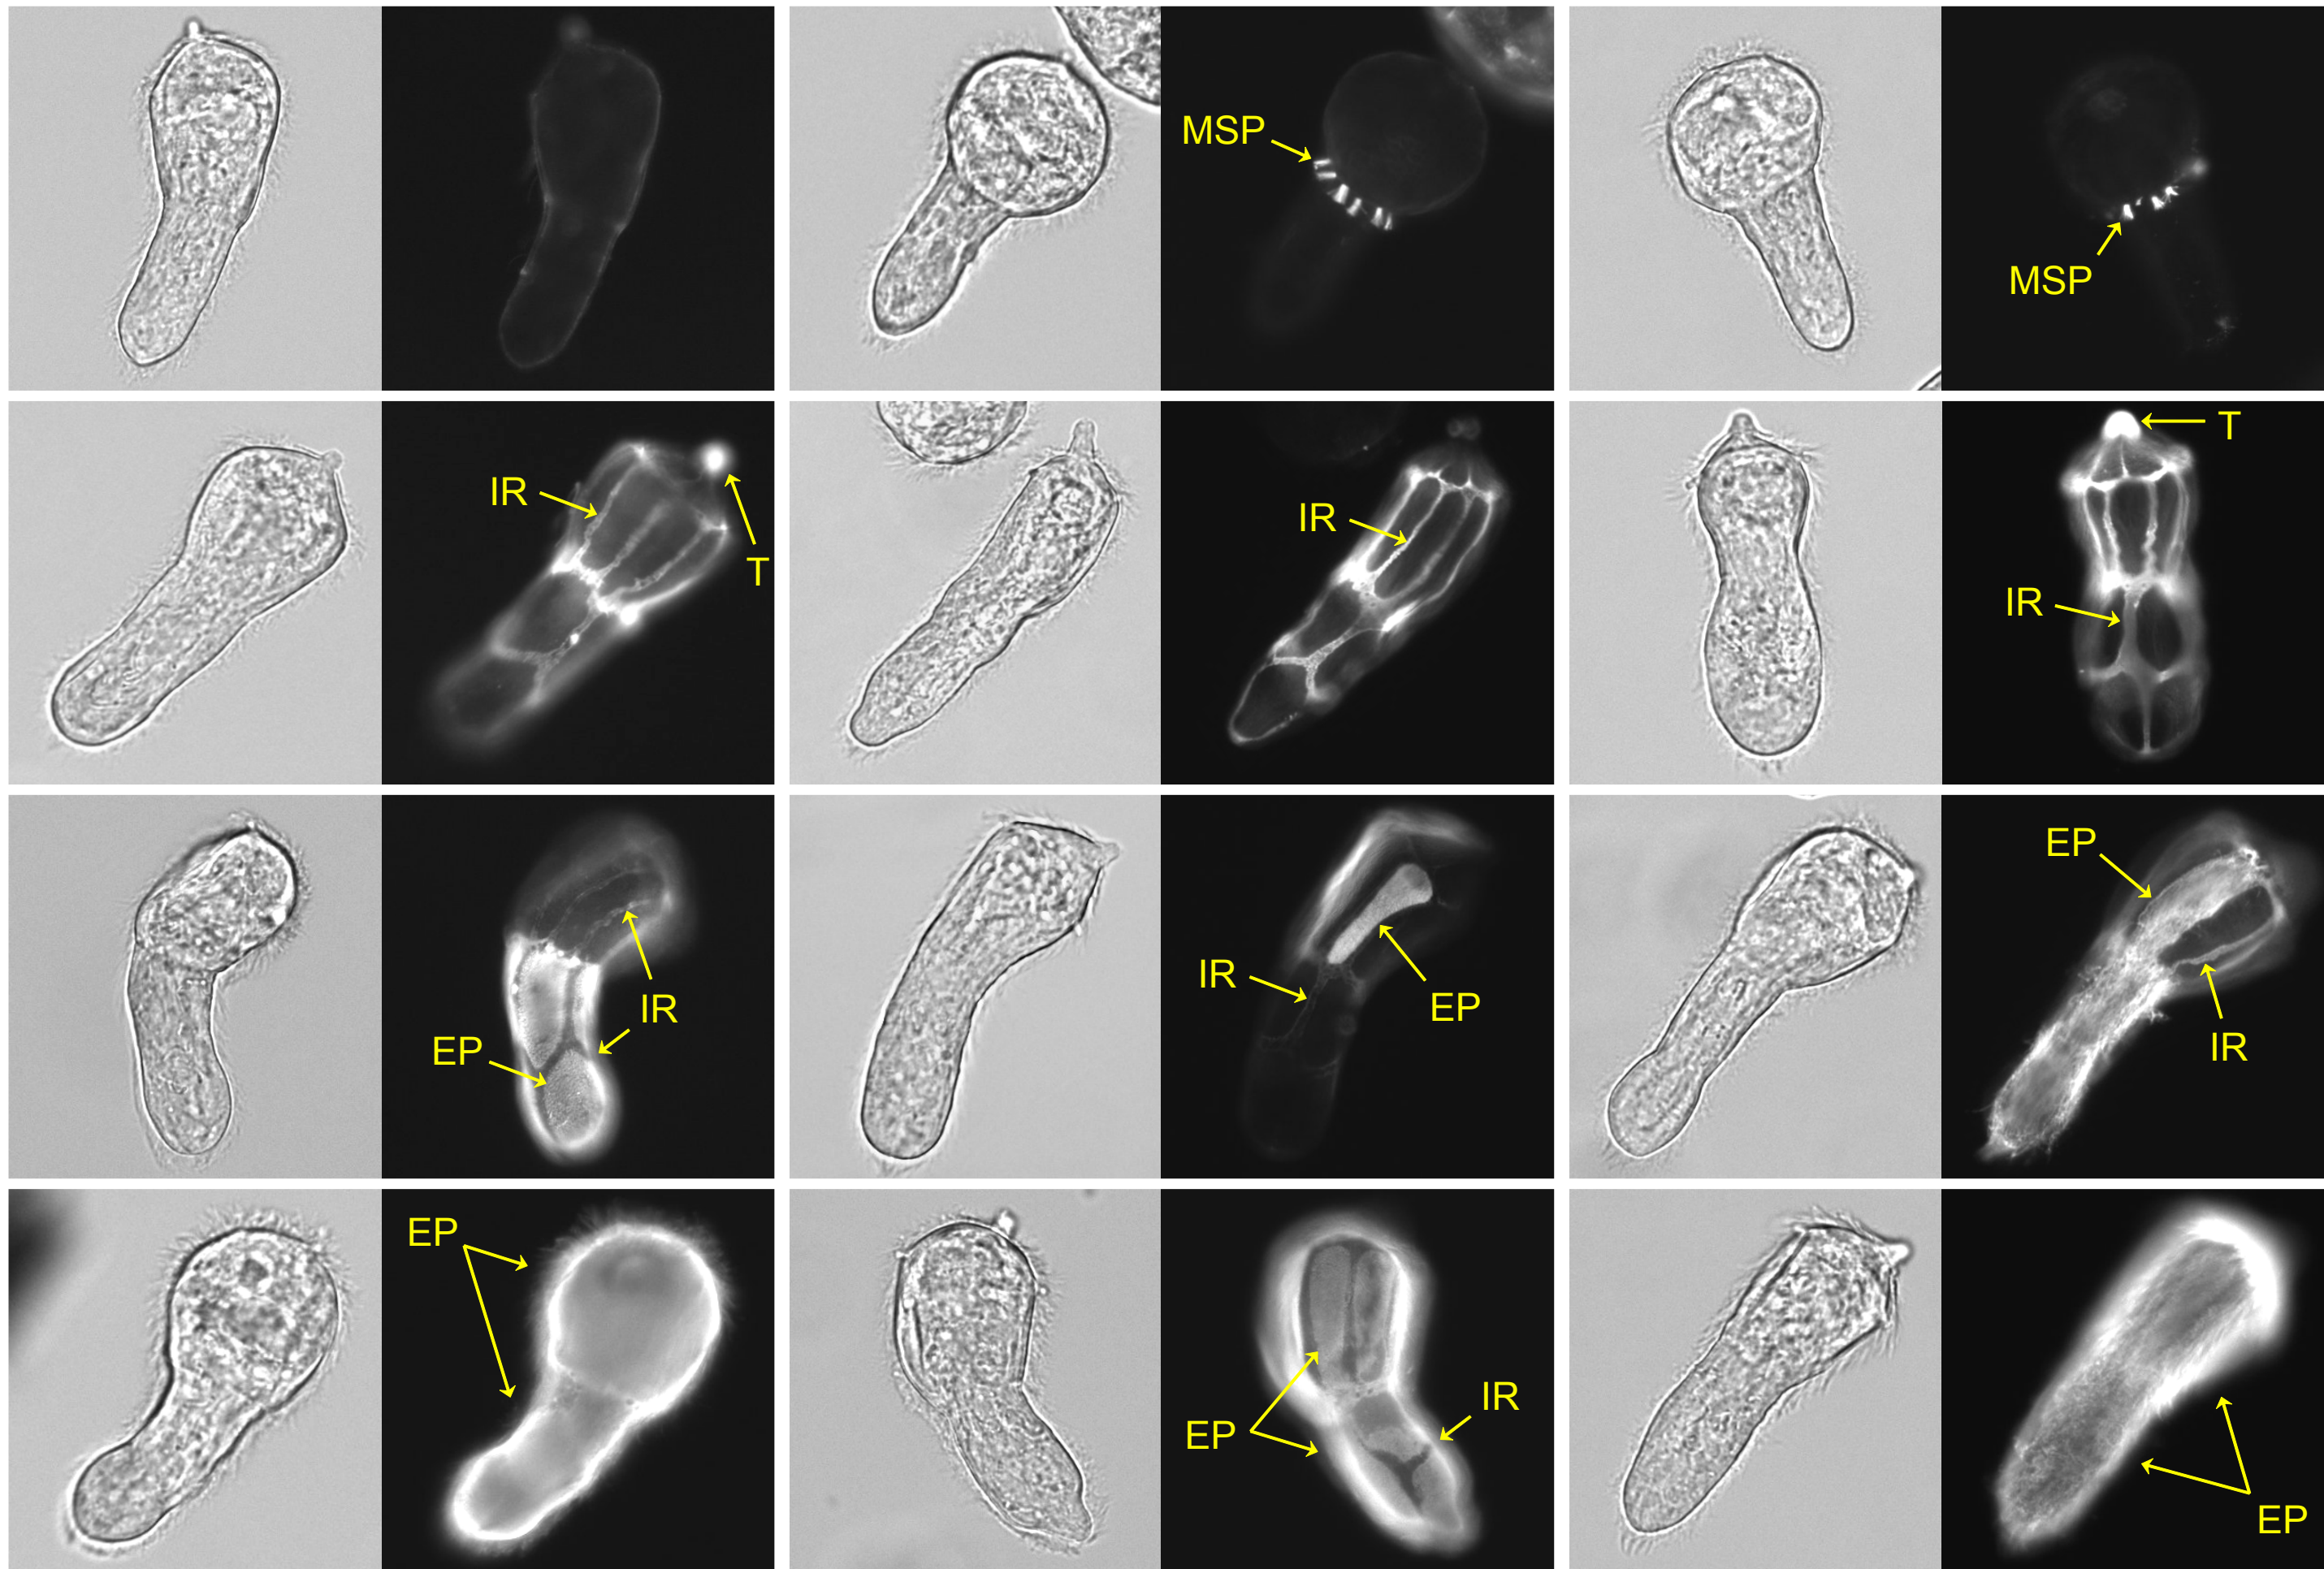

Supplement: NIHMS473431-supplement-Suppl__Fig__2.pdf [file NIHMS473431-supplement-Suppl__Fig__2.pdf]
